# Supplementary material
Source: publisher figshare collection journal article supplement (https://karger.figshare.com/articles/dataset/_/11297867)
Supplement: Supplementary file 1 [file 1]

Salas et al., (2014) Suppl. Reference List

1. Rethoré MO, Couturier J, Carpentier S, Ferrand J, Lejeune J. [Mosaic 14 trisomy in a female child with multiple abnormalities]. *Ann Génétique* 1975,18:71–4.
2. Martin AO, Ford MM, Khalil NT, Turk KB, Macintyre MN. 46,XX/47XX, + 14 mosaicism in a liveborn infant. *J Med Genet* 1977,14:214–8.
3. Johnson VP, Aceto T Jr, Likness C. Trisomy 14 mosaicism: case report and review. *Am J Med Genet* 1979,3:331–9.
4. Turleau C, de Grouchy J, Cornu A, Turquet M, Millet G. [Mosaic trisomy 14 due to an iso dicentric chromosome (author's transl)]. *Ann Génétique* 1980,23:238–40.
5. Jenkins MB, Kriel R, Boyd L. Trisomy 14 mosaicism in a translocation 14q15q carrier: probable dissociation and isochromosome formation. *J Med Genet* 1981,18:68–71.
6. Dallapiccola B, Ferranti G, Giannotti A, Novelli G, Pasquini L, Porfirio B. A live infant with trisomy 14 mosaicism and nuclear abnormalities of the neutrophils. *J Med Genet* 1984,21:467–70.
7. Ozawa N, Xu ZD, Soh K, Takabayashi T, Sato S, Yajima A, et al. A case of mosaic trisomy 14 due to an isochromosome, i(14q). *Jinrui Idengaku Zasshi Jpn J Hum Genet* 1984,29:69–76.
8. Pangalos C, Velissariou V, Ghica M, Liacacos D. Ring-14 and trisomy 14q in the same child. *Ann Génétique* 1984,27:38–40.
9. Petersen MB, Vejerslev LO, Beck B. Trisomy 14 mosaicism in a 2 year old girl. *J Med Genet* 1986,23:86–8.
10. Fujimoto A, Lin MS, Korula SR, Wilson MG. Trisomy 14 mosaicism with t(14;15)(q11;p11) in offspring of a balanced translocation carrier mother. *Am J Med Genet* 1985,22:333–42.
11. Kaplan LC, Wayne A, Crowell S, Latt SA. Trisomy 14 mosaicism in a liveborn male: clinical report and review of the literature. *Am J Med Genet* 1986,23:925–30.
12. Lipson MH. Trisomy 14 mosaicism syndrome. *Am J Med Genet* 1987,26:541–4.
13. Cheung SW, Kolacki PL, Watson MS, Crane JP. Prenatal diagnosis, fetal pathology, and cytogenetic analysis of mosaic trisomy 14. *Prenat Diagn* 1988,8:677–82.
14. Wegner RD, Hohle R, Karkut G, Sperling K. Trisomy 14 mosaicism leading to cytogenetic discrepancies in chorionic villi sampled at different times. *Prenat Diagn* 1988,8:239–43.

15. Cantú ES, Thomas IT, Frias JL. Unusual cytogenetic mosaicism involving chromosome 14 abnormalities in a child with an MR/MCA syndrome and abnormal pigmentation. *Clin Genet* 1989;36:189–95.
16. Vachvanichsanong P, Jinorose U, Sangnuachua P. Trisomy 14 mosaicism in a 5-year-old boy. *Am J Med Genet* 1991;40:80–3.
17. Fujimoto A, Allanson J, Crowe CA, Lipson MH, Johnson VP. Natural history of mosaic trisomy 14 syndrome. *Am J Med Genet* 1992;44:189–96.
18. Antonarakis SE, Blouin JL, Maher J, Avramopoulos D, Thomas G, Talbot CC Jr. Maternal uniparental disomy for human chromosome 14, due to loss of a chromosome 14 from somatic cells with t(13;14) trisomy 14. *Am J Hum Genet* 1993;52:45–52.
19. Lambert I, Kemp J, Jackson J, Joyce H, Mann S, Kan A, et al. Prenatal diagnosis and post-mortem study of a fetus with mosaic trisomy 14 due to a dic(14)(p11). *Prenat Diagn* 1994;14:507–10.
20. Iglesias A, McCurdy LD, Glass IA, Cotter PD, Illueca M, Perenyi A, et al. Mosaic trisomy 14 with hepatic involvement. *Ann Génétique* 1997;40:104–8.
21. Sepulveda W, Monckeberg MJ, Be C. Twin pregnancy discordant for trisomy 14 mosaicism: prenatal sonographic findings. *Prenat Diagn* 1998;18:481–4.
22. Tunca Y, Wilroy RS, Kadandale JS, Martens PR, Gunther WM, Tharapel AT. Hypomelanosis of ito and a “mirror image” whole chromosome duplication resulting in trisomy 14 mosaicism. *Ann Génétique* 2000;43:39–43.
23. Kuwahara RT, Henson T, Tunca Y, Wilroy SW. Hyperpigmentation along the lines of Blaschko with associated chromosome 14 mosaicism. *Pediatr Dermatol* 2001;18:360–1.
24. Lynch MF, Fernandes CJ, Shaffer LG, Potocki L. Trisomy 14 mosaicism: a case report and review of the literature. *J Perinatol* 2004;24:121–3.
25. Witters I, Moerman P, Fryns J-P. First-trimester scan in trisomy 14 mosaicism. *Prenat Diagn* 2004;24:573–4.
26. Kunst G, Gillbe C. General anesthesia for cardiac catheterization in a child with trisomy 14 mosaicism. *Anesth Analg* 2005;100:1860.
27. Tzoufi M, Kanioglou C, Dasoula A, Asproudis I, Tsatsoulis A, Sismani C, et al. Mosaic trisomy r(14) associated with epilepsy and mental retardation. *J Child Neurol* 2007;22:869–73.
28. Gerard-Blanluet M, Pipiras E, Levailant JM, Joye N, Koubi V, Kanafani S, et al. Prenatal detection of Pierre Robin sequence with deletion Xp and additional trisomy 14q by telomere screening. *Prenat Diagn* 2007;27:1062–3.

29. Wang J-C, Li CF, Shaw DRS. Prenatally diagnosed mosaic trisomy 14q with omphalocele. *Prenat Diagn* 2007,27:1260–1.
30. Merritt TA, Natarajan G. Trisomy 14 Mosaicism: a case without evidence of neurodevelopmental delay and a review of the literature. *Am J Perinatol* 2007,24:563–6.
31. Becerra-Solano LE, Arnaud-Lopez L, Diaz-Rodriguez M, Mantilla-Capacho JM, Nastasi-Catanese JA, Ortiz-Aranda M, et al. First case reported of Turner syndrome and trisomy 14 chromosomal mosaicism in a patient. *Clin Dysmorphol* 2008,17:27–30.
32. Von Sneider E, Lacassie Y. Is trisomy 14 mosaic a clinically recognizable syndrome?--case report and review. *Am J Med Genet A* 2008,146A:1609–13.
33. Shinawi M, Shao L, Jeng LJB, Shaw CA, Patel A, Bacino C, et al. Low-level mosaicism of trisomy 14: phenotypic and molecular characterization. *Am J Med Genet A* 2008,146A:1395–405.
34. McGaughran J, Stevens R, Blond A, Perry C. Nasal encephalocele in a child with mosaic trisomy 14. *Clin Dysmorphol* 2009,18:164–5.
35. Choi JH, Choi YJ, Kim SY. Congenital ocular anomaly in an infant with trisomy 14 mosaicism. *Korean J Ophthalmol KJO* 2012,26:316–8.
