# Supplementary material
Source: publisher figshare collection journal article supplement (https://karger.figshare.com/articles/dataset/_/11297867)
Supplement: Supplementary file 2 [file 1]

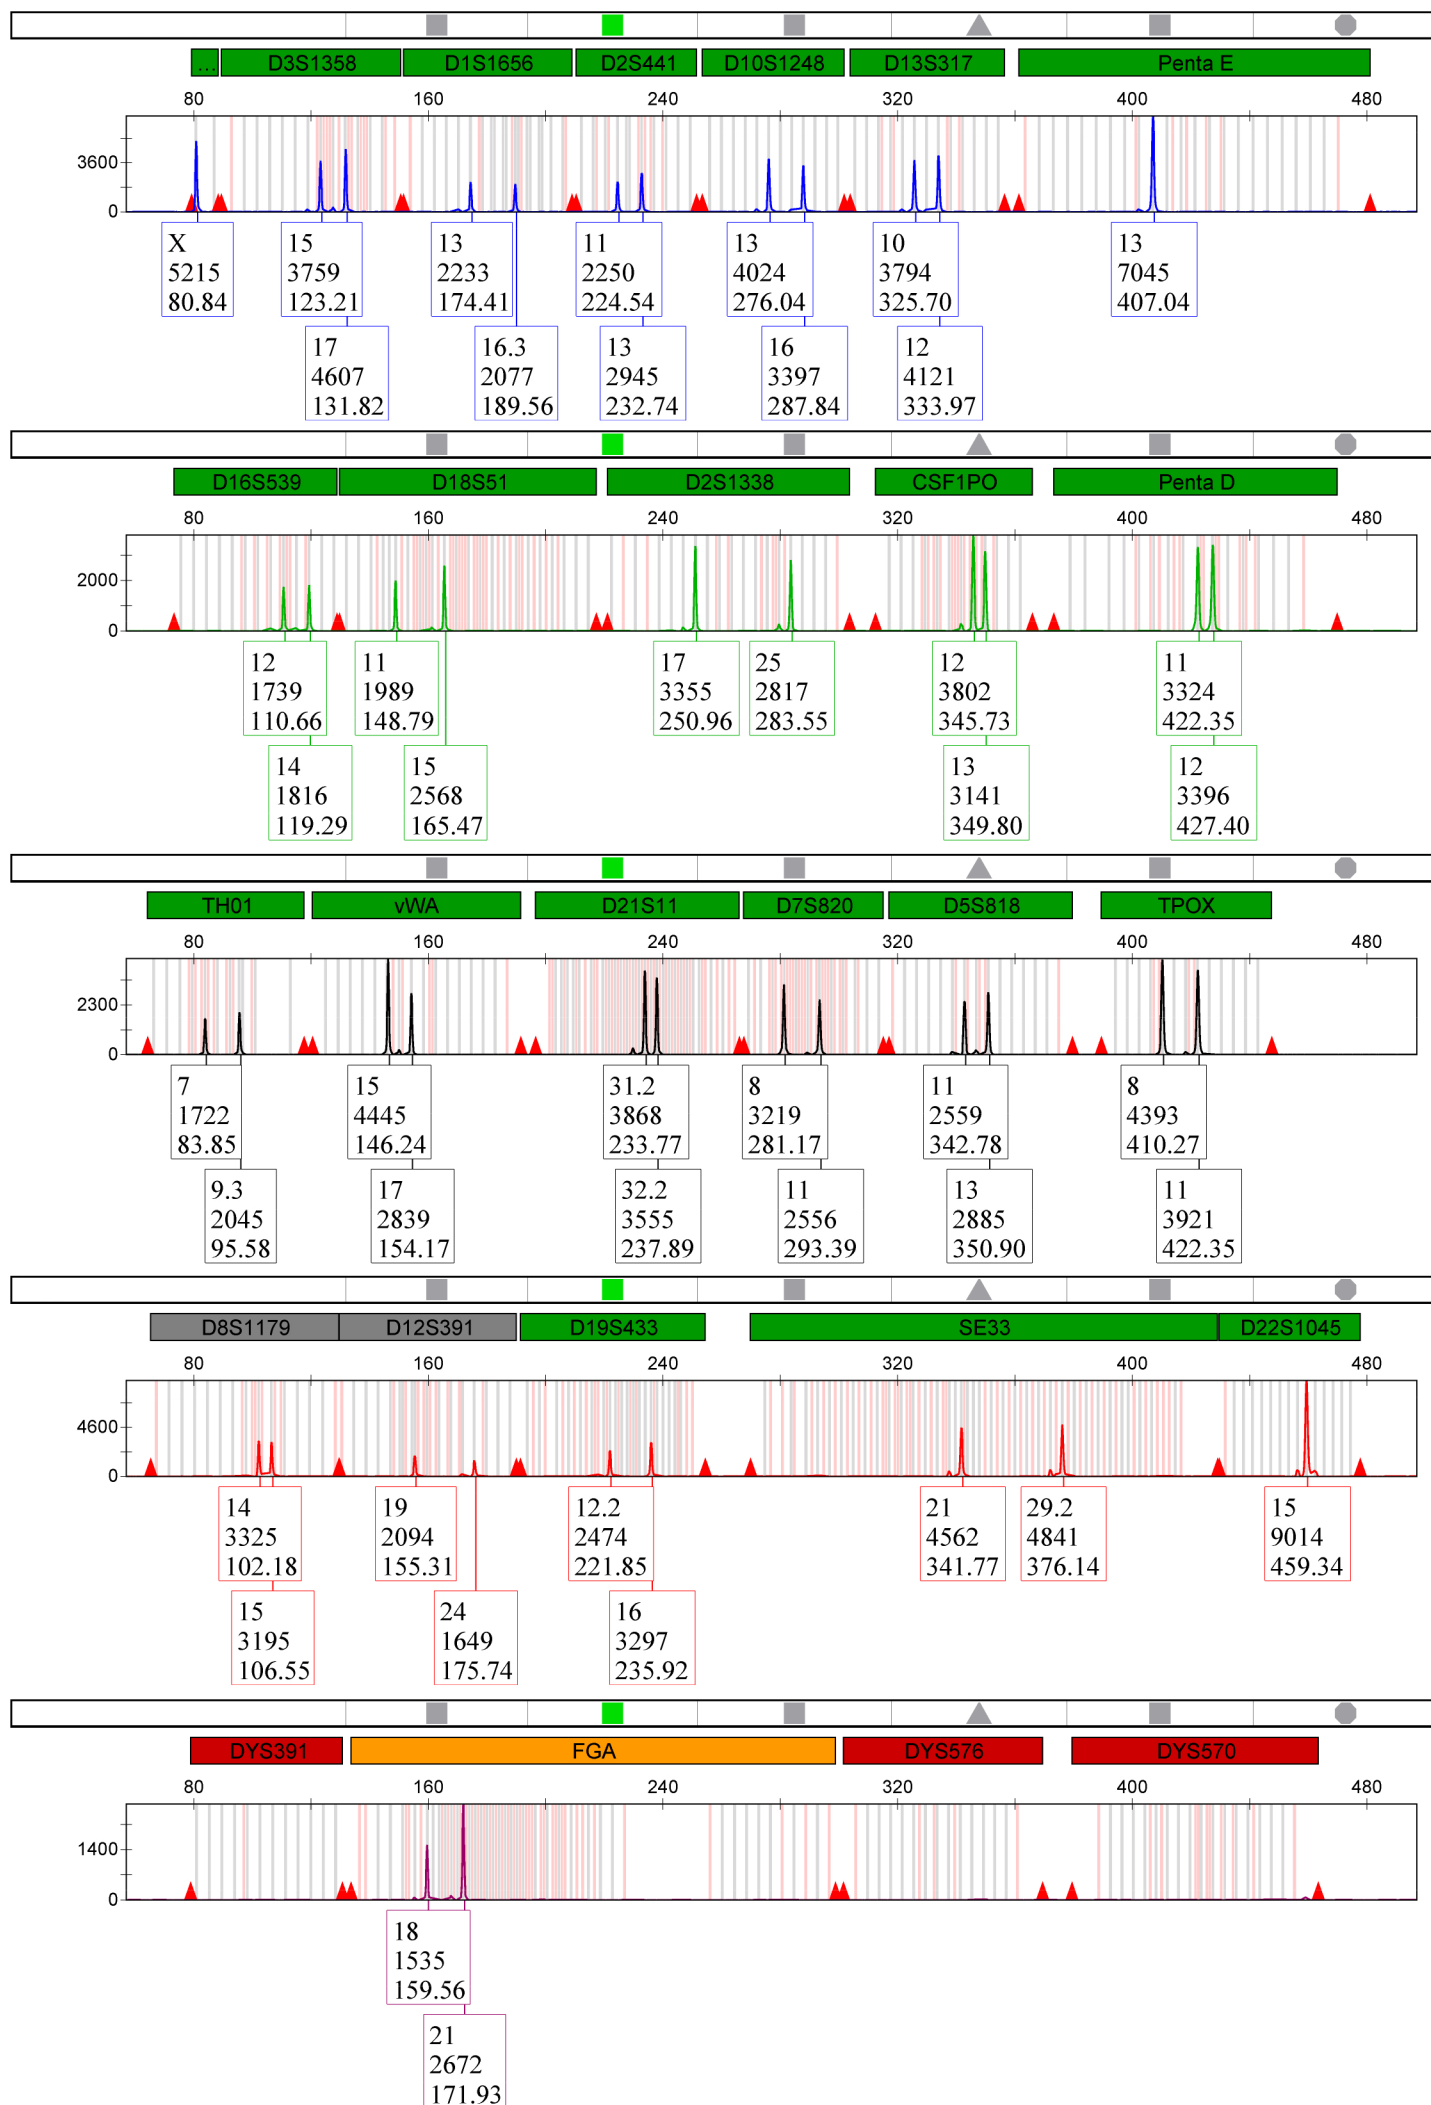

**Supplementary Figure 1: Autosomal STRs Analysis.** Representative electropherogram of 23 autosomal proband's DNA markers (PowerPlex® Fusion 6C kit)

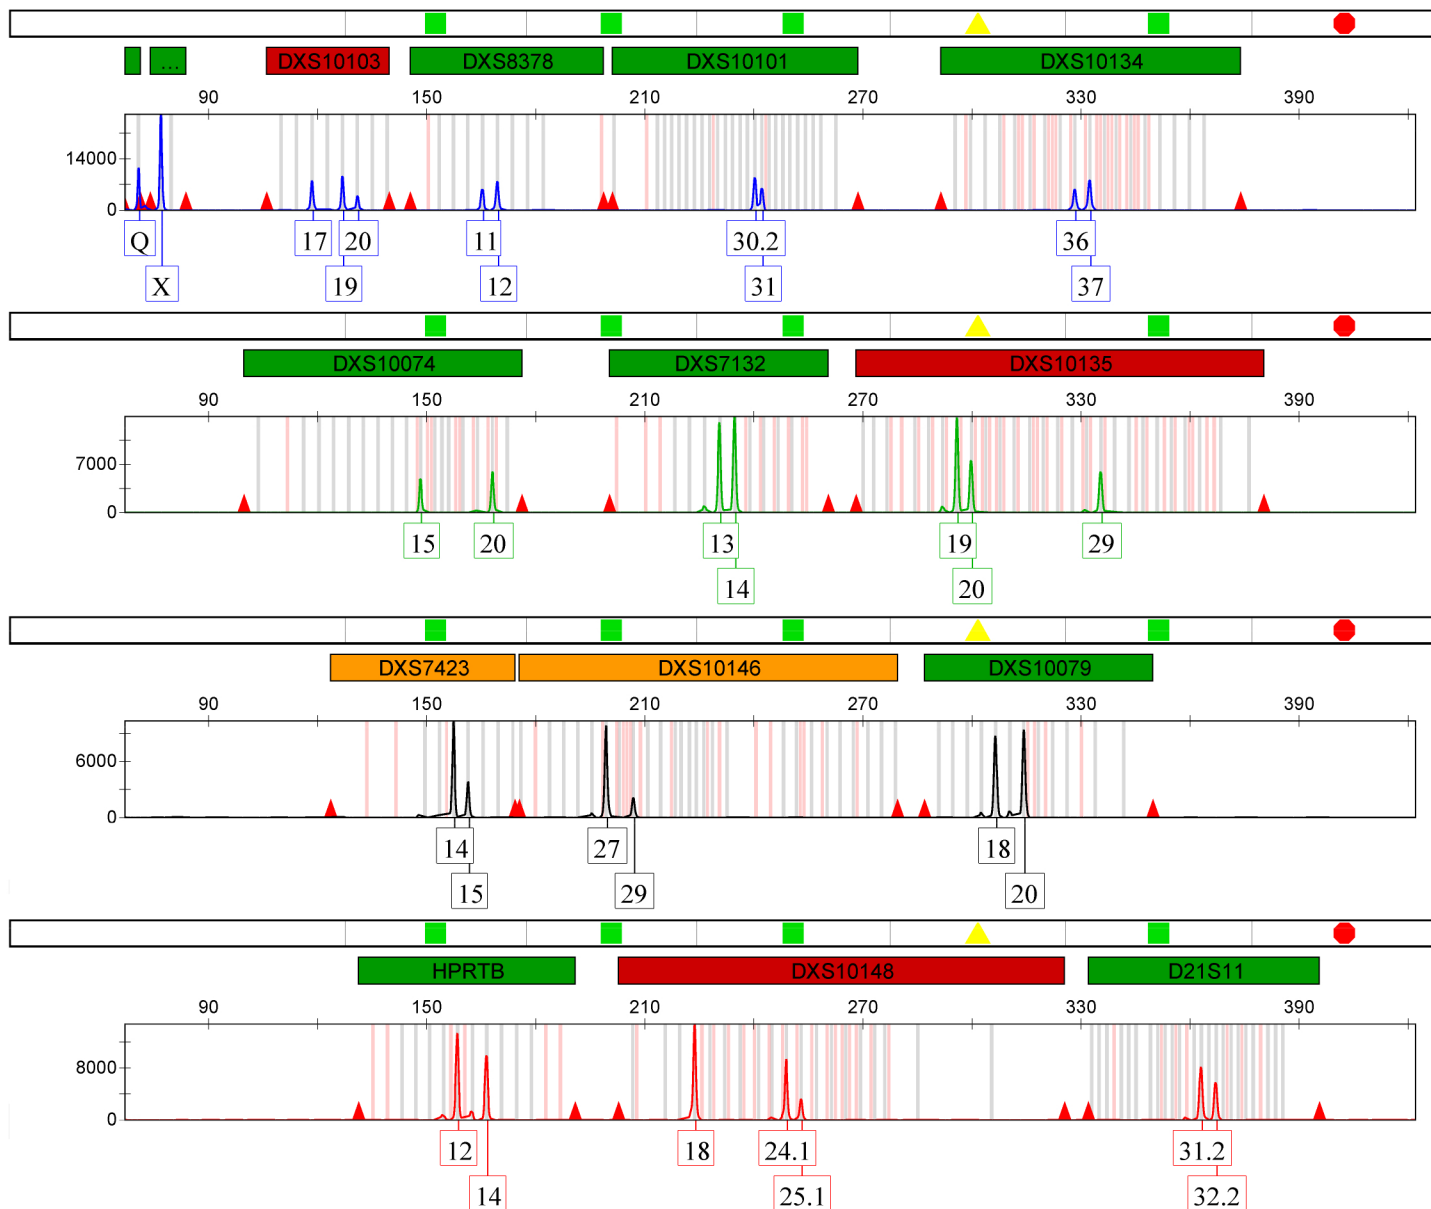

**Supplementary Figure 2: Chromosome X STRs Analysis.** Representative electropherogram of 12 chromosome X proband's markers (Investigator® Argus X-12)
